# Supplementary material for: Conspiracist Ideation as a Predictor of Climate-Science Rejection: An Alternative Analysis
Source: PubMed Central journal article supplement — Psychol Sci. 2015 May;26(5):664–6. doi: 10.1177/0956797614566469 (PMC4426137; doi:10.1177/0956797614566469), 2015-05
Supplement: DS_10.11770956797614566469_SupplementalTableandFigures.pdf [file DS_10.11770956797614566469_SupplementalTableandFigures.pdf]

**Supplemental Material for Dixon and Jones**

**Table S1: LOG13-blogs and LGO13-panel Datasets and Survey Questions**

Datasets are available on the authors' website (publications page of <http://www.cogsciwa.com/>)

**Lewandowsky, Oberauer and Gignac 2013 (referred to as 'LOG13-blogs')**

LOG13-blogs was an online survey posted on climate-related blogs between August and October 2010. 1377 survey responses were obtained. Incomplete or otherwise invalid responses were excluded, as were multiple responses originating from the same internet protocol (IP) address, leaving 1145 responses for analysis. The response rate from an online self-selected survey cannot be calculated, but the authors estimated that the blogs received more than three hundred thousand visits per month at the time of the survey (LOG13-blogs Supplemental Material p.2). We therefore estimate that less than one half of one percent of the potential readership may have completed the survey.

**Survey questions relevant to our analysis (variable names as in LOG13-blogs) (R = reverse scored).**

**Components of CLIM (from LOG13-blogs)**

CO2TempUp: I believe that burning fossil fuels increases atmospheric temperature to some measurable degree.

CO2AtmosUp: I believe that the burning of fossil fuels on the scale observed over the last 50 years has increased atmospheric temperature to an appreciable degree.

CO2WillNegChange: I believe that the burning of fossil fuels on the scale observed over the last 50 years will cause serious negative changes to the planet's climate unless there is a substantial switch to non-CO<sub>2</sub>-emitting energy sources.

CO2HasNegChange: I believe that the burning of fossil fuels on the scale observed over the last 50 years has caused serious negative changes to the planet's climate.

CauseCO2: Human CO<sub>2</sub> emissions cause climate change

**Components of CY (from LOG13-blogs)**

CYNewWorldOrder: A powerful and secretive group known as the New World Order is planning to eventually rule the world through an autonomous world government that would replace sovereign governments.

CYSARS: SARS (Severe Acute Respiratory Syndrome) was produced under laboratory conditions as a biological weapon.

CYPearlHarbor: The U.S. government had foreknowledge about the Japanese attack on Pearl Harbor but allowed the attack to take place so as to be able to enter the Second World War.

CYMLK: The assassination of Martin Luther King Jr. was the result of an organized conspiracy by U.S. government agencies such as the FBI and CIA.

CYMoon: The Apollo moon landings never happened and were staged in a Hollywood film studio.

CYJFK: The assassination of John F. Kennedy was not committed by the lone gunman Lee Harvey Oswald but was rather a detailed organized conspiracy to kill the president.

CY911: The U.S. government allowed the 9/11 attacks to take place so that it would have an excuse to achieve foreign (e.g., wars in Afghanistan and Iraq) and domestic (e.g., attacks on civil liberties) goals that had been determined prior to the attacks.

CYDiana: Princess Diana's death was not an accident but rather an organized assassination by members of the British royal family who disliked her.

DOI: 10.1177/0956797614566469

CYOklahoma: The Oklahoma City bombers Timothy McVeigh and Terry Nichols did not act alone but rather received assistance from neo-Nazi groups.

CYCoke: The Coca-Cola company intentionally changed to an inferior formula with the intent of driving up demand for their classic product, later reintroducing it for their financial gain.

CYRoswell: In July 1947, the U.S. military recovered the wreckage of an alien spacecraft from Roswell, NM, and covered up the fact.

CYArea51: Area 51 in Nevada is a secretive military base that contains hidden alien spacecraft and/or alien bodies.

### **Lewandowsky, Gignac and Oberauer 2013 (referred to as 'LGO13-panel')**

LGO13-panel surveyed a sample of US citizens drawn from an internet panel who were invited to participate in June 2012. The methods of LGO13-panel stated 'Participants were drawn from a completely bipartisan panel of more than 5.5 million U.S. residents (as of January 2013), via propensity weighting to ensure representativeness.' The response rate cannot be calculated as the number of participants invited was not reported, neither was the wording of the invitation. The paper stated that a total of 1383 respondents entered the survey page and 1001 completed responses were obtained.

### **Survey questions relevant to our analysis (variable names as in LGO13-panel) (R = reverse scored).**

#### **Components of CLIM (from LGO13-panel)**

CNatFluct: I believe that the climate is always changing and what we are currently observing is just natural fluctuation. (R)

CdueGHG: I believe that most of the warming over the last 50 years is due to the increase in greenhouse gas concentrations.

CseriousDamage: I believe that the burning of fossil fuels over the last 50 years has caused serious damage to the planet's climate.

CO2causesCC: Human CO<sub>2</sub> emissions cause climate change.

HumansInsign: Humans are too insignificant to have an appreciable impact on global temperature. (R)

#### **Components of CY (from LGO13-panel)**

CYNewWorldOrder: A powerful and secretive group known as the New World Order is planning to eventually rule the world through an autonomous world government that would replace sovereign governments.

CYMLK: The assassination of Martin Luther King Jr. was the result of an organized conspiracy by U.S. government agencies such as the FBI and CIA.

CYMoon: The Apollo moon landings never happened and were staged in a Hollywood film studio.

CYJFK: The assassination of John F. Kennedy was not committed by the lone gunman Lee Harvey Oswald but was rather a detailed organized conspiracy to kill the president.

CY911: The U.S. government allowed the 9/11 attacks to take place so that it would have an excuse to achieve foreign (e.g., wars in Afghanistan and Iraq) and domestic (e.g., attacks on civil liberties) goals that had been determined prior to the attacks.

CYDiana: Princess Diana's death was not an accident but rather an organized assassination by members of the British royal family who disliked her.

Figure S1: LOG13-*blogs* and LGO13-*panel* datasets as scatterplots with OLS straight line fits. Data points have been jittered (Chambers et al 1983).

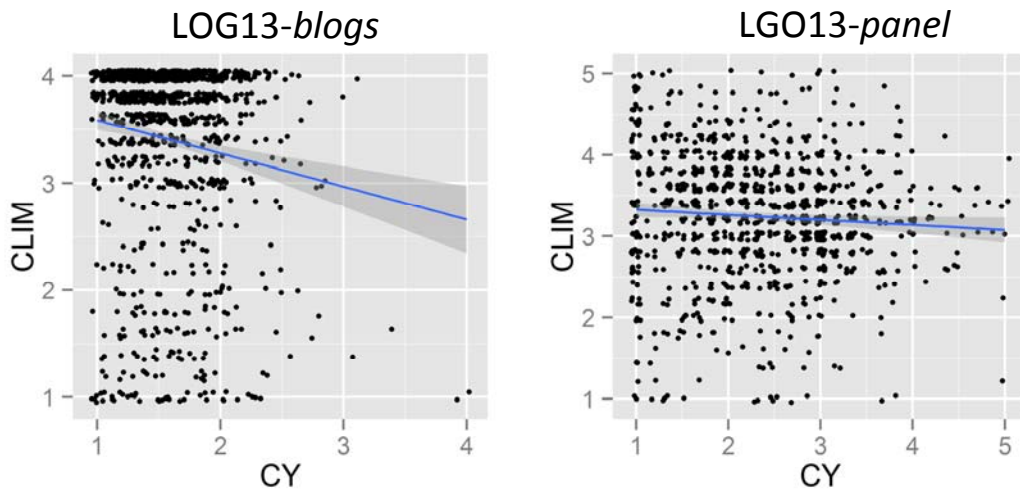

Figure S2: Histograms for LOG13-*blogs* and LGO13-*panel* Datasets

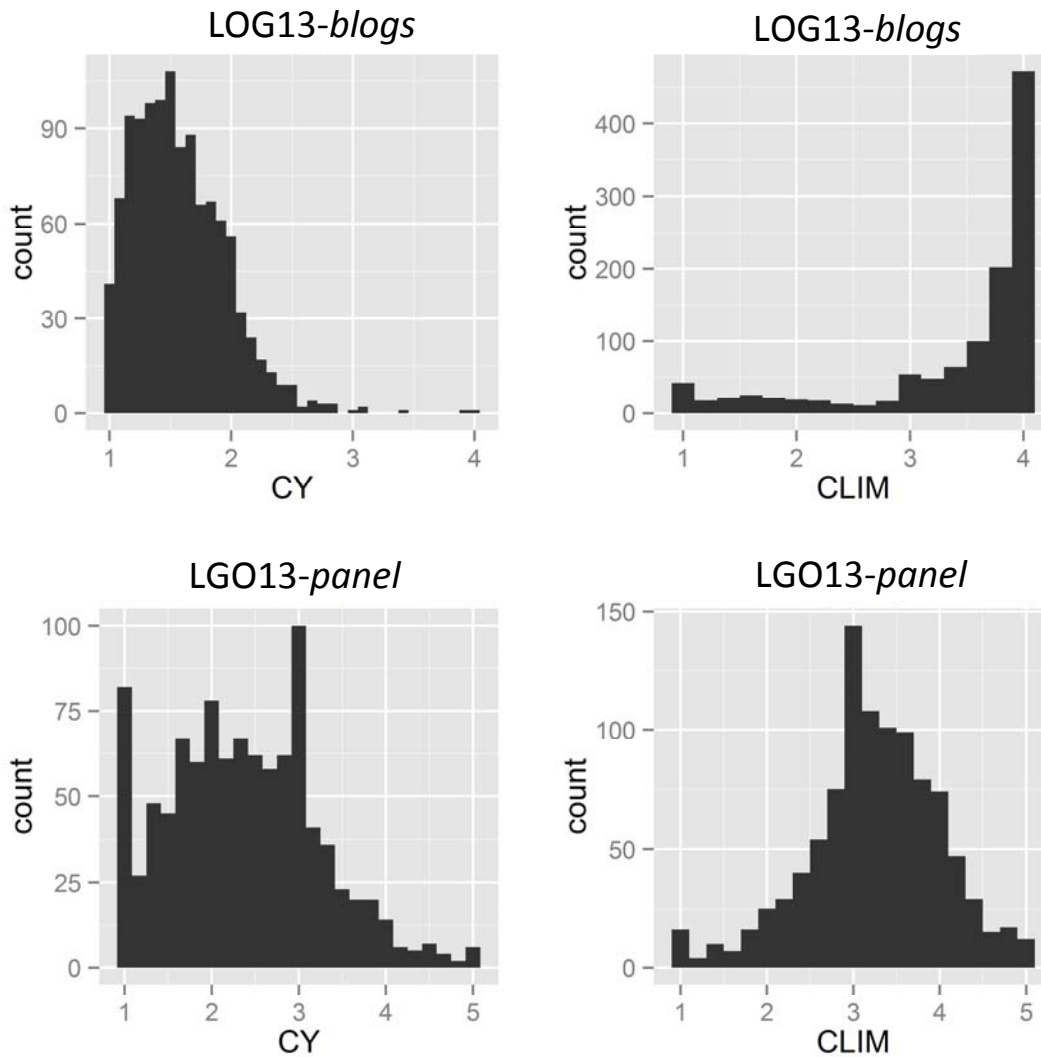

Figure S3: Loess fits for LOG13-*blogs*, LOG13-*blogs* excluding 18 outliers identified by Lewandowsky et al., and LGO13-*panel* Datasets. Data points have been jittered.

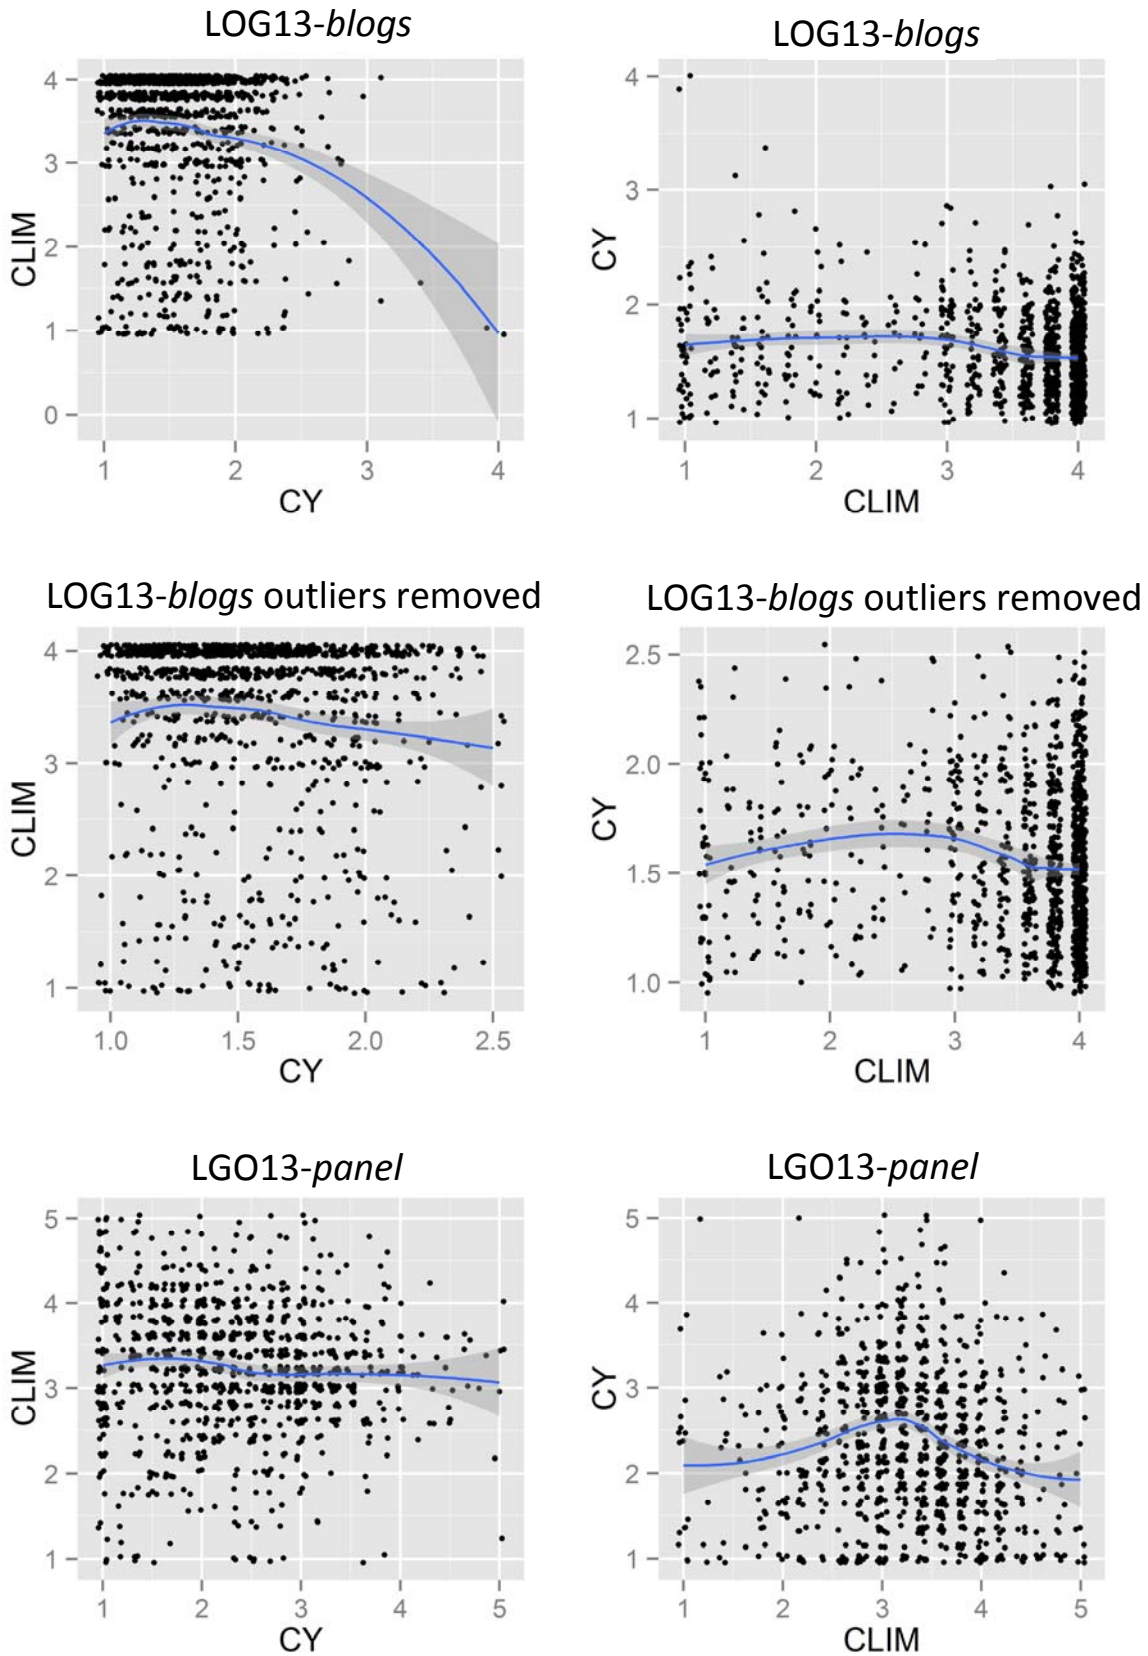

DOI: 10.1177/0956797614566469

The effect of omitting the 18 cases with  $CY > 2.5$  was tested in LOG13-*blogs* (Supplemental Material) as a sensitivity test. The authors of LOG13-*blogs* found that their analysis was robust to the removal of these cases. However Figure S3 shows that the non-parametric fits were substantially altered when those cases were removed, resulting in a loss of a significant relationship for CY predicting CLIM and the curvilinear relationship for CLIM predicting CY becoming more obvious.
